# Supplementary material for: Combination Biomarker of Immune Checkpoints Predict Prognosis of Urothelial Carcinoma
Source: MDPI journal article supplement (doi:10.3390/biomedicines10010008), 2021-12-22
Supplement: s1 [file s1]

# Supplementary Figure S1

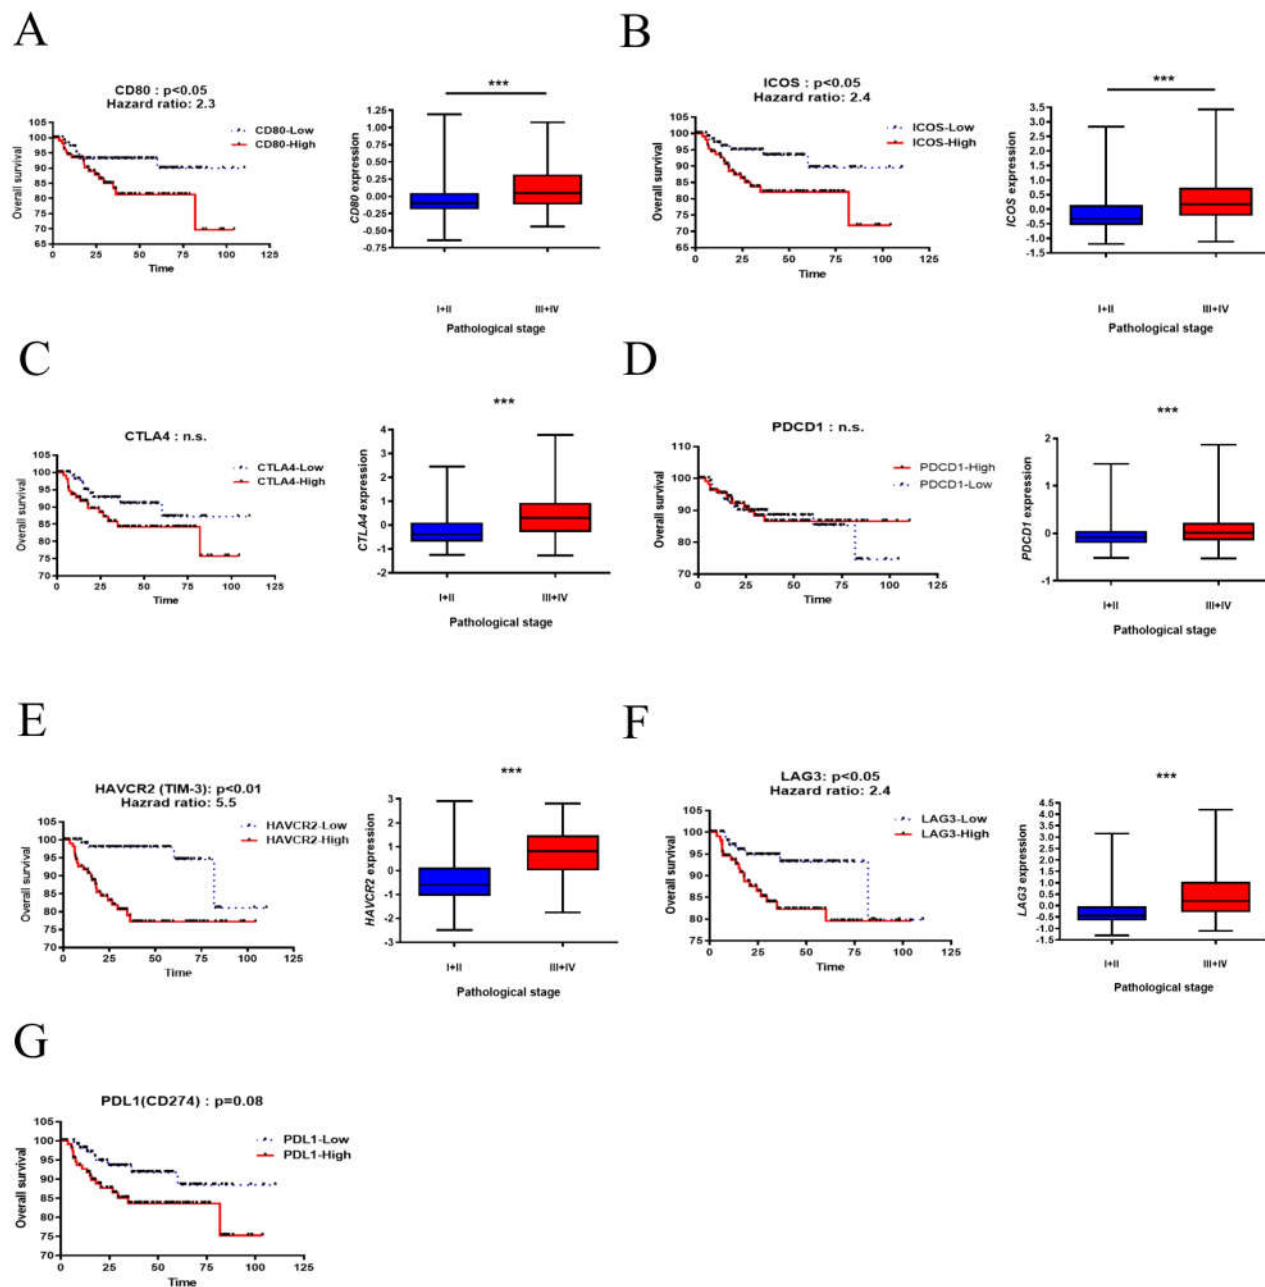

**Figure S1.** Prognostic analysis of immune checkpoints. 224 UC patients from GSE32894 dataset was grouped by lower and higher (A) *CD80* (B) *ICOS* (C) *CTLA4* (D) *PDCD1* (PD-1) (E) *HAVCR2* (TIM3) (F) *LAG3* and (G) *CD276* (PDL1) expression using the median value as a cut-off. Left panel: Kaplan-Meier survival analysis was performed. Right panel: The expression value of immunomodulatory molecules were grouped by early pathological stage (I+II,  $n=214$ ) and late-stage (III+IV,  $n=92$ ). \*\*\*  $p < 0.001$ .

**Table S1.** Multivariate Cox regression survival plot of 224 UC patients from GSE32894 dataset was grouped by lower and higher expression of immune checkpoints, including *CD276*, *CD80*, *ICOS*, *CTLA4*, *PDCD1* (PD-1), *HAVCR2* (TIM3) and

|               | B     | SE   | Wald   | df | <i>p</i> -value | Exp (B)      | 95.0% CI for Exp (B) |       |
|---------------|-------|------|--------|----|-----------------|--------------|----------------------|-------|
|               |       |      |        |    |                 |              | Lower                | Upper |
| stage         | 1.493 | .239 | 38.991 | 1  | .000            | 4.450        | 2.785                | 7.110 |
| grade         | −.537 | .261 | 4.224  | 1  | .040            | .585         | .350                 | .975  |
| <i>CD276</i>  | 1.264 | .481 | 6.911  | 1  | <b>.009</b>     | <b>3.541</b> | 1.380                | 9.089 |
| stage         | 1.429 | .222 | 41.269 | 1  | .000            | 4.175        | 2.699                | 6.456 |
| grade         | −.391 | .256 | 2.331  | 1  | .127            | .676         | .409                 | 1.117 |
| <i>CD80</i>   | .398  | .436 | .834   | 1  | .361            | 1.489        | .634                 | 3.499 |
| stage         | 1.431 | .222 | 41.475 | 1  | .000            | 4.184        | 2.707                | 6.468 |
| grade         | −.364 | .258 | 1.986  | 1  | .159            | .695         | .419                 | 1.153 |
| <i>ICOS</i>   | .396  | .464 | .729   | 1  | .393            | 1.486        | .598                 | 3.692 |
| stage         | 1.445 | .225 | 41.428 | 1  | .000            | 4.242        | 2.732                | 6.586 |
| grade         | −.411 | .255 | 2.591  | 1  | .107            | .663         | .402                 | 1.094 |
| <i>CTLA4</i>  | .275  | .435 | .399   | 1  | .528            | 1.316        | .561                 | 3.085 |
| stage         | 1.406 | .212 | 43.979 | 1  | .000            | 4.080        | 2.693                | 6.182 |
| grade         | −.420 | .255 | 2.709  | 1  | .100            | .657         | .398                 | 1.084 |
| <i>PDCD1</i>  | −.136 | .413 | .108   | 1  | .742            | .873         | .389                 | 1.960 |
| stage         | 1.402 | .236 | 35.400 | 1  | .000            | 4.063        | 2.560                | 6.448 |
| grade         | −.313 | .256 | 1.488  | 1  | .223            | .731         | .443                 | 1.209 |
| <i>HAVCR2</i> | .900  | .556 | 2.617  | 1  | .106            | 2.460        | .827                 | 7.318 |
| stage         | 1.440 | .224 | 41.428 | 1  | .000            | 4.222        | 2.723                | 6.546 |
| grade         | −.362 | .255 | 2.012  | 1  | .156            | .696         | .422                 | 1.148 |
| <i>LAG3</i>   | .490  | .462 | 1.123  | 1  | .289            | 1.632        | .660                 | 4.035 |

Df, degree of freedom  
CI, confidence interval

## Supplementary Figure S2

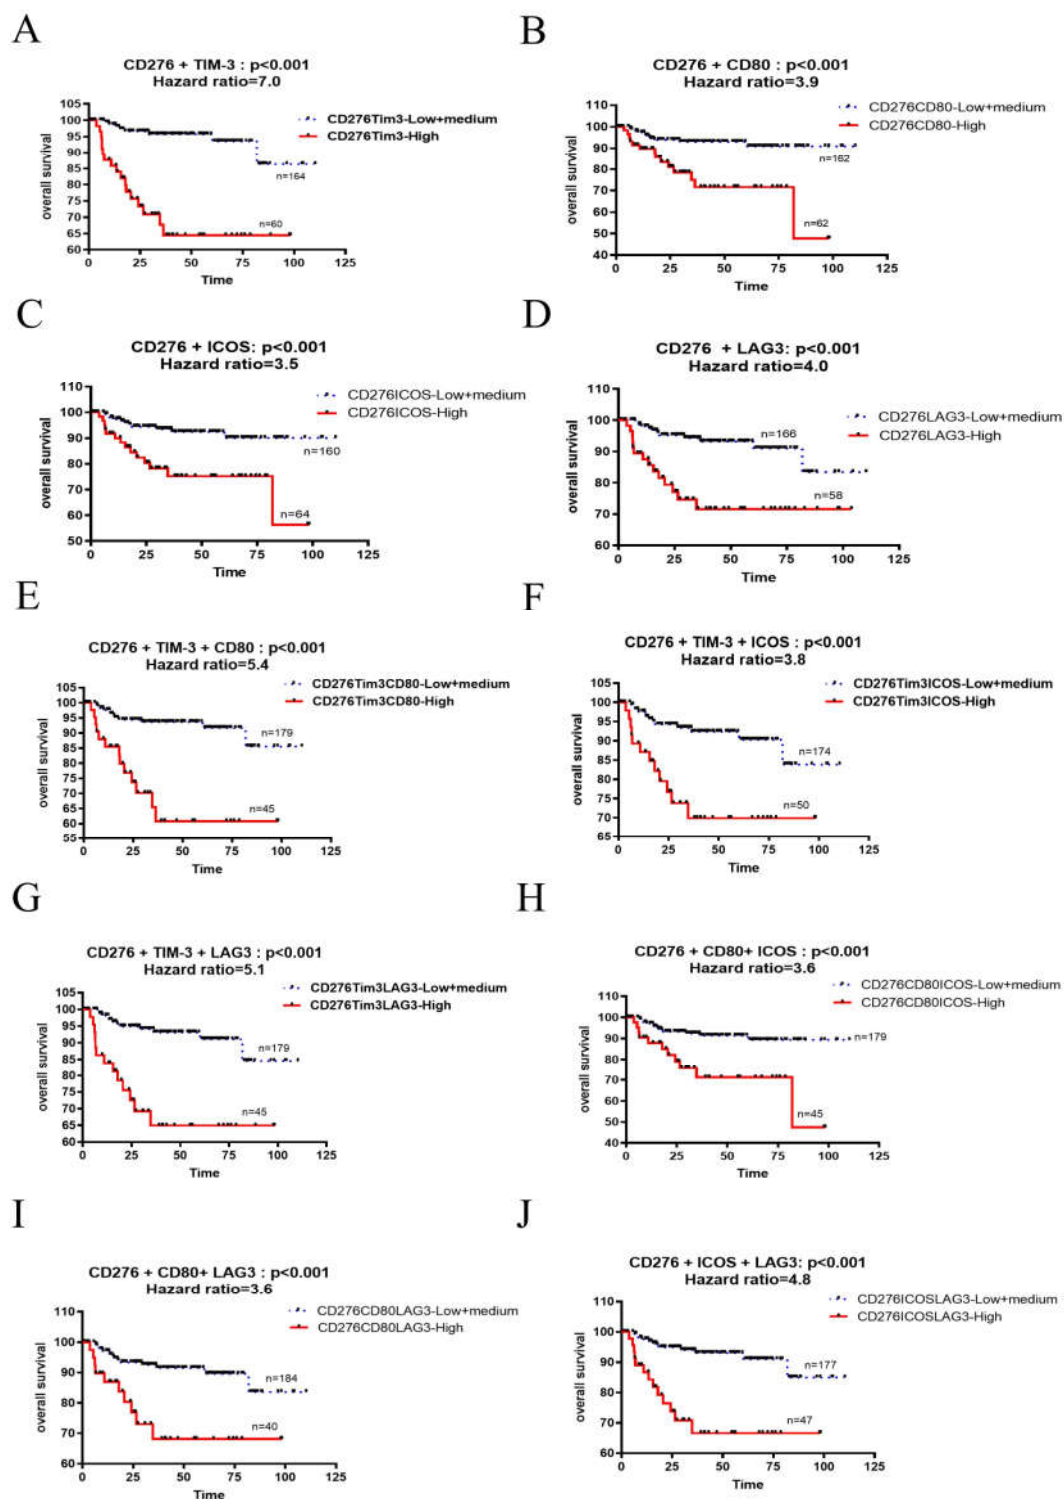

**Figure S2.** Kaplan-Meier survival analysis of combinatorial immune checkpoints. Univariate overall survival of 224 UC patients from GSE32894 was grouped by double/triple-negative as low expression, single-positive as medium expression and double/triple-positive as high expression using the median value as the cut-off.

**Table S2.** Cox-regression survival analysis of combinatorial immune checkpoints. Multivariate overall survival of 224 UC patients from GSE32894 was grouped by double/triple-negative as low expression, single-positive as medium expression and double/triple-positive as high expression using the median value as the cut-off.

|               | B     | SE   | Wald   | df | <i>p</i> -value | Exp(B)       | 95.0% CI for Exp(B) |       |
|---------------|-------|------|--------|----|-----------------|--------------|---------------------|-------|
|               |       |      |        |    |                 |              | Lower               | Upper |
| stage         | 1.365 | .244 | 31.264 | 1  | .000            | 3.916        | 2.427               | 6.319 |
| grade         | -.457 | .257 | 3.152  | 1  | .076            | .633         | .383                | 1.049 |
| cd276tim3     | 1.340 | .436 | 9.453  | 1  | <b>.002</b>     | <b>3.820</b> | 1.626               | 8.977 |
| stage         | 1.398 | .229 | 37.227 | 1  | .000            | 4.048        | 2.583               | 6.343 |
| grade         | -.441 | .256 | 2.965  | 1  | .085            | .643         | .390                | 1.063 |
| cd276cd80     | .991  | .407 | 5.918  | 1  | .015            | 2.694        | 1.212               | 5.988 |
| stage         | 1.462 | .234 | 39.018 | 1  | .000            | 4.316        | 2.728               | 6.830 |
| grade         | -.442 | .255 | 3.003  | 1  | .083            | .642         | .390                | 1.060 |
| cd276icos     | .992  | .407 | 5.938  | 1  | .015            | 2.698        | 1.214               | 5.993 |
| stage         | 1.441 | .230 | 39.322 | 1  | .000            | 4.226        | 2.693               | 6.630 |
| grade         | -.427 | .256 | 2.778  | 1  | .096            | .653         | .395                | 1.078 |
| cd276lag3     | .927  | .403 | 5.296  | 1  | .021            | 2.527        | 1.147               | 5.565 |
| stage         | 1.360 | .233 | 34.185 | 1  | .000            | 3.897        | 2.470               | 6.149 |
| grade         | -.432 | .254 | 2.879  | 1  | .090            | .649         | .394                | 1.069 |
| cd276tim3cd80 | .925  | .408 | 5.126  | 1  | .024            | 2.521        | 1.132               | 5.613 |
| stage         | 1.418 | .228 | 38.625 | 1  | .000            | 4.127        | 2.639               | 6.454 |
| grade         | -.414 | .256 | 2.623  | 1  | .105            | .661         | .400                | 1.091 |
| cd276tim3icos | .822  | .402 | 4.181  | 1  | .041            | 2.276        | 1.035               | 5.004 |
| stage         | 1.403 | .233 | 36.161 | 1  | .000            | 4.068        | 2.575               | 6.427 |
| grade         | -.414 | .254 | 2.654  | 1  | .103            | .661         | .402                | 1.088 |
| cd276tim3lag3 | 1.081 | .403 | 7.201  | 1  | .007            | 2.947        | 1.338               | 6.490 |
| stage         | 1.410 | .226 | 38.990 | 1  | .000            | 4.096        | 2.631               | 6.377 |
| grade         | -.425 | .255 | 2.768  | 1  | .096            | .654         | .397                | 1.079 |
| cd276cd80icos | .819  | .405 | 4.091  | 1  | .043            | 2.268        | 1.026               | 5.016 |
| stage         | 1.407 | .223 | 39.621 | 1  | .000            | 4.083        | 2.635               | 6.327 |
| grade         | -.417 | .255 | 2.671  | 1  | .102            | .659         | .399                | 1.087 |
| cd276cd80lag3 | .666  | .410 | 2.632  | 1  | .105            | 1.946        | .871                | 4.350 |
| stage         | 1.416 | .233 | 36.875 | 1  | .000            | 4.120        | 2.609               | 6.507 |
| grade         | -.436 | .252 | 2.990  | 1  | .084            | .647         | .395                | 1.060 |
| cd276icoslag3 | 1.048 | .403 | 6.753  | 1  | .009            | 2.852        | 1.294               | 6.287 |

Df, degree of freedom  
CI, confidence interval
